# Supplementary material
Source: publisher figshare collection journal article supplement (https://frontiersin.figshare.com/ndownloader/files/25653290)
Supplement: Supplementary file [file 25653290]

## Code for ANOVA

```
#work directory
setwd("Folder path")

#read file
set=read.csv("File name.csv")

set$Gen=as.factor(set$Gen)
set$Rep=as.factor(set$Rep)

str(set)

library(lme4)

install.packages("lme4")

m1=lm(GY~1+Env+Env:Rep+Gen+Env*Gen,data=set)

anova(m1)
```

## Code for interactions

**#The code is designed in such a way that it discriminates genome wide and associated markers in the genotypic file. For example, genome wide haplotypes labelled as M1, M2, .....Mn and associated haplotypes are labelled as GeneM3, GeneM5.....GeneMn etc.**

```
library(lattice)

library(coxme)

library(MASS)

#set work directory
setwd("Folder path")

#read phenotypic data

P<-read.table("Phenotypic data.txt",header=T, dec="," , sep="\t",stringsAsFactors=FALSE,na.string="NA")

P

#read.kinship

K<-read.table("kinship.txt",row.names=1, dec="." , sep="\t",stringsAsFactors=FALSE)

colnames(K)<-row.names(K)

K<-as.matrix(K)
```

K

```
#read structure
```

```
Q<-read.table("PCs.txt",header=T, dec=".", sep="\t",stringsAsFactors=FALSE)
```

Q

```
#read genotyping data and contain only the useful markers
```

```
G<-read.table("genotypic.txt",header=T, dec=".", sep="\t",stringsAsFactors=FALSE)
```

G

```
#on how many trait we will work?, change if necessary
```

```
nb_trait<-1
```

```
trait<-"Trait5"
```

```
nb_trait
```

```
#How many associated markers (Genes)?
```

```
#If only the one which starts by "gene"
```

```
gene_list<-colnames(G)[grep("Gene",colnames(G)[-1])]
```

```
gene_list
```

```
#Manual way
```

```
#gene_list or associated markers<-c("M12","M4","M3")
```

```
nb_gene<-nlevels(as.factor(gene_list))
```

```
nb_gene
```

```
#How many PCA axes are there in the Q file?
```

```
nb_PCA<-dim(Q)[2]-1
```

```
nb_PCA
```

```
#How many axes you will use?
```

```

PCA_use<-3 #be sure to put as much in the asreml model

RESULTAT_F<-0

for (i in 1:nb_trait)
{

#nb_marker_ok<-nlevels(as.factor(Marker_OK[which(Marker_OK$Trait==trait[i]),2]))
#marker_ok<-levels(as.factor(Marker_OK[which(Marker_OK$Trait==trait[i]),2]))
nb_marker_ok<-dim(G)[2]-1
marker_ok<-colnames(G)[-1]

a<-0

for (j in 1:nb_marker_ok)
{

for (k in 1:nb_gene)
{
print(c("trait",i,"on",nb_trait))
a<-a+1
print(c(a,"on",nb_marker_ok*nb_gene))

#Prepare a file with all information for a combination marker_gene
GWAS<-merge(Q,P[,c(1,which(colnames(P)==trait[i]))],by="LINE")
GWAS<-merge(GWAS,G[,c(1,which(colnames(G)==marker_ok[j])
,which(colnames(G)==gene_list[k]))],by="LINE")

GWAS<-GWAS[which(is.na(GWAS[,nb_PCA+3])==F),]
GWAS<-GWAS[which(is.na(GWAS[,nb_PCA+4])==F),]

```

```

GWAS[,nb_PCA+5]<-paste(GWAS[,nb_PCA+3],GWAS[,nb_PCA+4])
GWAS[,nb_PCA+5]<-as.factor(GWAS[,nb_PCA+5])
GWAS[,nb_PCA+4]<-as.factor(GWAS[,nb_PCA+4])
GWAS[,nb_PCA+3]<-as.factor(GWAS[,nb_PCA+3])
GWAS[,1]<-as.factor(GWAS[,1])
colnames(GWAS)[nb_PCA+5]<-"MARKER_GENE"
colnames(GWAS)[nb_PCA+4]<-"GENE"
colnames(GWAS)[nb_PCA+3]<-"MARKER"
colnames(GWAS)[nb_PCA+2]<-"TRAIT"
resum<-as.data.frame(table(GWAS[,nb_PCA+5]))

if(dim(resum)[1]!=4) next

#Set up kinship matrix
K1<-K[which(row.names(K) %in% levels(GWAS[, "LINE"]))
      ,which(colnames(K) %in% levels(GWAS[, "LINE"]))]

#####

#only I change this because appears like character and should be numeric
GWAS$TRAIT=as.numeric(GWAS$TRAIT)
#####

###Association

#Make sure how have the same number of pca axes that in PCA_use
mm <-lmekin(TRAIT ~ PC1+PC2+PC3+MARKER+GENE+MARKER:GENE+(1 | LINE),
            varlist=list(K1),data=GWAS)

z <- fixef(mm) / sqrt(diag(vcov(mm, useScale = FALSE)))
Pvalue <- 2 * (1 - pnorm(abs(z)))

```

```

#Extract coefficients
COEFF<-fixef(mm)[(PCA_use+2):(PCA_use+4)]

#Number of lines per allele combinations
EFF<-cbind(t(data.frame(resum[,1])),t(data.frame(resum[,2])))[1,]

SNP1<-marker_ok[j]
SNP2<-gene_list[k]

print(c(SNP1,SNP2))

#P-value
PVAL<-Pvalue[(PCA_use+2):(PCA_use+4)]

#set results table
RESULTAT<-c(trait[i],SNP1,SNP2,EFF,PVAL,COEFF)
RESULTAT_F<-rbind(RESULTAT_F,RESULTAT)

}
}
}

colnames(RESULTAT_F)<-c("TRAIT","Marker","GENE","M_ALL1/G_ALL1","M_ALL1/G_ALL2",
  "M_ALL2/G_ALL1","M_ALL2/G_ALL2","NB1","NB2","NB3","NB4","PVAL_M",
  "PVAL_G","PVAL_M:G","coeff(M_ALL2)","coeff(G_ALL2)","coeff(M_ALL2/G_ALL2)")

write.table(RESULTAT_F,file="MARKER_GENE_INTERACTION.txt",sep="\t",dec=".",row.names=F)

```
